# Supplementary material for: Synthesis of a stable adduct of dialane(4) (Al2H4) via hydrogenation of a magnesium(I) dimer
Source: Springer Nature journal article supplement (doi:10.1038/nchem.762), 2010-08-01
Supplement: 41557_2010_BFnchem762_MOESM8_ESM.cif [file 41557_2010_BFnchem762_MOESM8_ESM.cif]

 
data_compound4 
 
_audit_creation_method            SHELXL-97 
_chemical_name_systematic 
; 
 ? 
; 
_chemical_name_common             ? 
_chemical_melting_point           ? 
_chemical_formula_moiety          ? 
_chemical_formula_sum 
 'C54 H76 Al2 N4' 
_chemical_formula_weight          835.15 
 
loop_ 
 _atom_type_symbol 
 _atom_type_description 
 _atom_type_scat_dispersion_real 
 _atom_type_scat_dispersion_imag 
 _atom_type_scat_source 
 'C'  'C'   0.0033   0.0016 
 'International Tables Vol C Tables 4.2.6.8 and 6.1.1.4' 
 'H'  'H'   0.0000   0.0000 
 'International Tables Vol C Tables 4.2.6.8 and 6.1.1.4' 
 'N'  'N'   0.0061   0.0033 
 'International Tables Vol C Tables 4.2.6.8 and 6.1.1.4' 
 'Al'  'Al'   0.0645   0.0514 
 'International Tables Vol C Tables 4.2.6.8 and 6.1.1.4' 
 
_symmetry_cell_setting            monoclinic 
_symmetry_space_group_name_H-M    P2(1)/n 
 
loop_ 
 _symmetry_equiv_pos_as_xyz 
 'x, y, z' 
 '-x+1/2, y+1/2, -z+1/2' 
 '-x, -y, -z' 
 'x-1/2, -y-1/2, z-1/2' 
 
_cell_length_a                    13.3869(3) 
_cell_length_b                    12.1848(2) 
_cell_length_c                    15.7738(2) 
_cell_angle_alpha                 90.00 
_cell_angle_beta                  97.2620(10) 
_cell_angle_gamma                 90.00 
_cell_volume                      2552.33(8) 
_cell_formula_units_Z             2 
_cell_measurement_temperature     123(2) 
_cell_measurement_reflns_used     ? 
_cell_measurement_theta_min       ? 
_cell_measurement_theta_max       ? 
 
_exptl_crystal_description        'block' 
_exptl_crystal_colour             'yellow' 
_exptl_crystal_size_max           0.30 
_exptl_crystal_size_mid           0.20 
_exptl_crystal_size_min           0.15 
_exptl_crystal_density_meas       ? 
_exptl_crystal_density_diffrn     1.087 
_exptl_crystal_density_method     'not measured' 
_exptl_crystal_F_000              908 
_exptl_absorpt_coefficient_mu     0.094 
_exptl_absorpt_correction_type    'multi-scan' 
_exptl_absorpt_correction_T_min   0.965 
_exptl_absorpt_correction_T_max   0.984 
_exptl_absorpt_process_details    'SADABS (Sheldrick, 1997)'
 
 
_exptl_special_details 
; 
 ? 
; 
 
_diffrn_ambient_temperature       123(2) 
_diffrn_radiation_wavelength      0.71073 
_diffrn_radiation_type            MoK\a 
_diffrn_radiation_source          'fine-focus sealed tube' 
_diffrn_radiation_monochromator   graphite 
_diffrn_measurement_device_type   'Bruker X8 CCD' 
_diffrn_measurement_method        ? 
_diffrn_detector_area_resol_mean  ? 
_diffrn_standards_number          ? 
_diffrn_standards_interval_count  ? 
_diffrn_standards_interval_time   ? 
_diffrn_standards_decay_%         ? 
_diffrn_reflns_number             18360 
_diffrn_reflns_av_R_equivalents   0.0340 
_diffrn_reflns_av_sigmaI/netI     0.0475 
_diffrn_reflns_limit_h_min        -18 
_diffrn_reflns_limit_h_max        18 
_diffrn_reflns_limit_k_min        -16 
_diffrn_reflns_limit_k_max        17 
_diffrn_reflns_limit_l_min        -21 
_diffrn_reflns_limit_l_max        13 
_diffrn_reflns_theta_min          2.12 
_diffrn_reflns_theta_max          30.00 
_reflns_number_total              7403 
_reflns_number_gt                 5458 
_reflns_threshold_expression      >2sigma(I) 
 
_computing_data_collection        ? 
_computing_cell_refinement        ? 
_computing_data_reduction         ? 
_computing_structure_solution     'SHELXS-97 (Sheldrick, 1990)' 
_computing_structure_refinement   'SHELXL-97 (Sheldrick, 1997)' 
_computing_molecular_graphics     ? 
_computing_publication_material   ? 
 
_refine_special_details 
; 
 Refinement of F^2^ against ALL reflections.  The weighted R-factor wR and 
 goodness of fit S are based on F^2^, conventional R-factors R are based 
 on F, with F set to zero for negative F^2^. The threshold expression of 
 F^2^ > 2sigma(F^2^) is used only for calculating R-factors(gt) etc. and is 
 not relevant to the choice of reflections for refinement.  R-factors based 
 on F^2^ are statistically about twice as large as those based on F, and R- 
 factors based on ALL data will be even larger. 
 The hydride ligands of the complex were located from difference maps and
 their positional parameters freely refined.
 The structure refined with relatively high Ueq values for one methyl
 carbon (C25) (and its attached H atoms) associated with one of the 
 isopropyl substituents of the NHC ligand. An assessment of possible 
 disorder of the methyl groups associated with isopropyl group led 
 to the conclusion that no disorder that could be modelled was present.
; 
 
_refine_ls_structure_factor_coef  Fsqd  
_refine_ls_matrix_type            full 
_refine_ls_weighting_scheme       calc  
_refine_ls_weighting_details 
 'calc w=1/[\s^2^(Fo^2^)+(0.0544P)^2^+0.6429P] where P=(Fo^2^+2Fc^2^)/3' 
_atom_sites_solution_primary      direct 
_atom_sites_solution_secondary    difmap 
_atom_sites_solution_hydrogens    geom 
_refine_ls_hydrogen_treatment     mixed 
_refine_ls_extinction_method      none 
_refine_ls_extinction_coef        ? 
_refine_ls_number_reflns          7403 
_refine_ls_number_parameters      285 
_refine_ls_number_restraints      0 
_refine_ls_R_factor_all           0.0721 
_refine_ls_R_factor_gt            0.0490 
_refine_ls_wR_factor_ref          0.1250 
_refine_ls_wR_factor_gt           0.1132 
_refine_ls_goodness_of_fit_ref    1.027 
_refine_ls_restrained_S_all       1.027 
_refine_ls_shift/su_max           0.001 
_refine_ls_shift/su_mean          0.000 
 
loop_ 
 _atom_site_label 
 _atom_site_type_symbol 
 _atom_site_fract_x 
 _atom_site_fract_y 
 _atom_site_fract_z 
 _atom_site_U_iso_or_equiv 
 _atom_site_adp_type 
 _atom_site_occupancy 
 _atom_site_symmetry_multiplicity 
 _atom_site_calc_flag 
 _atom_site_refinement_flags 
 _atom_site_disorder_assembly 
 _atom_site_disorder_group 
Al1 Al 0.04923(3) 0.98845(3) 0.07734(2) 0.01883(10) Uani 1 1 d . . . 
N1 N -0.12585(8) 0.94763(8) 0.18781(6) 0.0157(2) Uani 1 1 d . . . 
C1 C -0.04804(9) 1.01130(9) 0.16924(7) 0.0142(2) Uani 1 1 d . . . 
N2 N -0.05222(8) 1.09993(8) 0.22174(6) 0.0151(2) Uani 1 1 d . . . 
C2 C -0.17712(10) 0.99572(10) 0.24935(8) 0.0197(3) Uani 1 1 d . . . 
H2C H -0.2339 0.9666 0.2721 0.024 Uiso 1 1 calc R . . 
C3 C -0.13094(10) 1.09124(10) 0.27037(8) 0.0193(3) Uani 1 1 d . . . 
H3C H -0.1488 1.1431 0.3109 0.023 Uiso 1 1 calc R . . 
C4 C -0.15203(10) 0.84160(10) 0.15056(8) 0.0167(2) Uani 1 1 d . . . 
C5 C -0.09241(10) 0.75101(10) 0.17982(8) 0.0183(3) Uani 1 1 d . . . 
C6 C -0.12018(11) 0.64968(11) 0.14355(9) 0.0230(3) Uani 1 1 d . . . 
H6 H -0.0821 0.5863 0.1618 0.028 Uiso 1 1 calc R . . 
C7 C -0.20251(12) 0.63978(11) 0.08121(9) 0.0254(3) Uani 1 1 d . . . 
H7 H -0.2192 0.5701 0.0564 0.030 Uiso 1 1 calc R . . 
C9 C -0.26045(11) 0.73009(11) 0.05481(9) 0.0238(3) Uani 1 1 d . . . 
H9 H -0.3169 0.7216 0.0123 0.029 Uiso 1 1 calc R . . 
C10 C -0.23725(10) 0.83396(10) 0.08976(8) 0.0192(3) Uani 1 1 d . . . 
C11 C -0.00456(11) 0.76265(11) 0.25030(9) 0.0228(3) Uani 1 1 d . . . 
H11 H 0.0265 0.8363 0.2436 0.027 Uiso 1 1 calc R . . 
C12 C -0.04284(14) 0.76051(15) 0.33781(10) 0.0374(4) Uani 1 1 d . . . 
H12A H -0.0932 0.8184 0.3403 0.056 Uiso 1 1 calc R . . 
H12B H 0.0136 0.7728 0.3827 0.056 Uiso 1 1 calc R . . 
H12C H -0.0734 0.6889 0.3464 0.056 Uiso 1 1 calc R . . 
C13 C 0.07759(12) 0.67659(13) 0.24632(10) 0.0312(3) Uani 1 1 d . . . 
H13A H 0.0515 0.6041 0.2592 0.047 Uiso 1 1 calc R . . 
H13B H 0.1357 0.6945 0.2883 0.047 Uiso 1 1 calc R . . 
H13C H 0.0983 0.6759 0.1889 0.047 Uiso 1 1 calc R . . 
C14 C -0.30598(11) 0.93120(11) 0.06573(9) 0.0249(3) Uani 1 1 d . . . 
H14 H -0.2689 0.9994 0.0863 0.030 Uiso 1 1 calc R . . 
C15 C -0.40037(13) 0.92291(15) 0.11132(11) 0.0372(4) Uani 1 1 d . . . 
H15A H -0.4382 0.8567 0.0921 0.056 Uiso 1 1 calc R . . 
H15B H -0.4427 0.9877 0.0978 0.056 Uiso 1 1 calc R . . 
H15C H -0.3804 0.9189 0.1732 0.056 Uiso 1 1 calc R . . 
C16 C -0.33623(13) 0.94228(15) -0.03048(10) 0.0364(4) Uani 1 1 d . . . 
H16A H -0.2760 0.9379 -0.0598 0.055 Uiso 1 1 calc R . . 
H16B H -0.3695 1.0132 -0.0429 0.055 Uiso 1 1 calc R . . 
H16C H -0.3826 0.8829 -0.0505 0.055 Uiso 1 1 calc R . . 
C17 C 0.02097(10) 1.18720(10) 0.23672(8) 0.0175(2) Uani 1 1 d . . . 
C18 C 0.09073(10) 1.18035(11) 0.31032(9) 0.0223(3) Uani 1 1 d . . . 
C19 C 0.15697(12) 1.26817(14) 0.32752(10) 0.0323(3) Uani 1 1 d . . . 
H19 H 0.2055 1.2663 0.3769 0.039 Uiso 1 1 calc R . . 
C20 C 0.15289(13) 1.35762(14) 0.27375(11) 0.0369(4) Uani 1 1 d . . . 
H20 H 0.1976 1.4175 0.2870 0.044 Uiso 1 1 calc R . . 
C21 C 0.08397(12) 1.36092(12) 0.20040(10) 0.0304(3) Uani 1 1 d . . . 
H21 H 0.0832 1.4225 0.1634 0.037 Uiso 1 1 calc R . . 
C22 C 0.01583(11) 1.27557(10) 0.17996(9) 0.0208(3) Uani 1 1 d . . . 
C23 C 0.09849(12) 1.08053(13) 0.36842(9) 0.0277(3) Uani 1 1 d . . . 
H23 H 0.0440 1.0281 0.3460 0.033 Uiso 1 1 calc R . . 
C24 C 0.08263(15) 1.11118(17) 0.45943(10) 0.0433(4) Uani 1 1 d . . . 
H24A H 0.1304 1.1689 0.4805 0.065 Uiso 1 1 calc R . . 
H24B H 0.0936 1.0464 0.4963 0.065 Uiso 1 1 calc R . . 
H24C H 0.0137 1.1379 0.4600 0.065 Uiso 1 1 calc R . . 
C25 C 0.19942(17) 1.0229(2) 0.36629(14) 0.0617(6) Uani 1 1 d . . . 
H25A H 0.2077 1.0045 0.3071 0.093 Uiso 1 1 calc R . . 
H25B H 0.2012 0.9555 0.4003 0.093 Uiso 1 1 calc R . . 
H25C H 0.2541 1.0716 0.3901 0.093 Uiso 1 1 calc R . . 
C26 C -0.06076(11) 1.27693(11) 0.10057(9) 0.0230(3) Uani 1 1 d . . . 
H26 H -0.0696 1.1997 0.0795 0.028 Uiso 1 1 calc R . . 
C27 C -0.16264(13) 1.31692(15) 0.12214(11) 0.0393(4) Uani 1 1 d . . . 
H27A H -0.1841 1.2710 0.1675 0.059 Uiso 1 1 calc R . . 
H27B H -0.2125 1.3121 0.0712 0.059 Uiso 1 1 calc R . . 
H27C H -0.1567 1.3933 0.1416 0.059 Uiso 1 1 calc R . . 
C28 C -0.02788(16) 1.34570(14) 0.02837(10) 0.0407(4) Uani 1 1 d . . . 
H28A H -0.0276 1.4235 0.0442 0.061 Uiso 1 1 calc R . . 
H28B H -0.0748 1.3342 -0.0238 0.061 Uiso 1 1 calc R . . 
H28C H 0.0400 1.3237 0.0182 0.061 Uiso 1 1 calc R . . 
H1 H 0.0943(15) 0.8725(16) 0.0993(12) 0.049 Uiso 1 1 d . . . 
H2 H 0.1259(15) 1.0769(15) 0.1089(12) 0.049 Uiso 1 1 d . . . 
 
loop_ 
 _atom_site_aniso_label 
 _atom_site_aniso_U_11 
 _atom_site_aniso_U_22 
 _atom_site_aniso_U_33 
 _atom_site_aniso_U_23 
 _atom_site_aniso_U_13 
 _atom_site_aniso_U_12 
Al1 0.0203(2) 0.02130(19) 0.01559(19) -0.00215(15) 0.00481(15) 0.00211(16) 
N1 0.0183(5) 0.0142(5) 0.0149(5) -0.0008(4) 0.0028(4) -0.0002(4) 
C1 0.0155(6) 0.0139(5) 0.0122(5) 0.0006(4) -0.0016(4) 0.0016(4) 
N2 0.0168(5) 0.0145(5) 0.0141(5) -0.0008(4) 0.0027(4) 0.0000(4) 
C2 0.0207(6) 0.0197(6) 0.0201(6) -0.0011(5) 0.0078(5) -0.0007(5) 
C3 0.0218(6) 0.0187(6) 0.0186(6) -0.0019(5) 0.0070(5) 0.0006(5) 
C4 0.0197(6) 0.0139(5) 0.0171(6) -0.0018(4) 0.0048(5) -0.0029(5) 
C5 0.0226(6) 0.0167(5) 0.0162(6) 0.0001(5) 0.0051(5) -0.0005(5) 
C6 0.0284(7) 0.0161(6) 0.0256(7) 0.0002(5) 0.0075(6) 0.0002(5) 
C7 0.0313(8) 0.0195(6) 0.0266(7) -0.0075(5) 0.0088(6) -0.0073(6) 
C9 0.0239(7) 0.0256(7) 0.0215(7) -0.0050(5) 0.0017(5) -0.0078(6) 
C10 0.0198(6) 0.0192(6) 0.0189(6) -0.0008(5) 0.0034(5) -0.0028(5) 
C11 0.0278(7) 0.0194(6) 0.0202(6) 0.0009(5) -0.0014(5) 0.0033(5) 
C12 0.0463(10) 0.0458(9) 0.0198(7) 0.0010(7) 0.0027(7) 0.0189(8) 
C13 0.0330(8) 0.0330(8) 0.0266(8) 0.0014(6) -0.0001(6) 0.0125(7) 
C14 0.0215(7) 0.0225(6) 0.0288(7) 0.0016(5) -0.0038(6) -0.0012(5) 
C15 0.0286(8) 0.0435(9) 0.0396(9) -0.0012(8) 0.0048(7) 0.0105(7) 
C16 0.0280(8) 0.0480(10) 0.0316(8) 0.0099(7) -0.0030(7) 0.0016(7) 
C17 0.0183(6) 0.0172(5) 0.0177(6) -0.0054(5) 0.0048(5) -0.0031(5) 
C18 0.0198(6) 0.0272(7) 0.0200(6) -0.0068(5) 0.0028(5) -0.0009(5) 
C19 0.0264(8) 0.0418(9) 0.0280(8) -0.0125(7) 0.0008(6) -0.0097(7) 
C20 0.0371(9) 0.0353(8) 0.0396(9) -0.0128(7) 0.0106(7) -0.0200(7) 
C21 0.0386(9) 0.0216(7) 0.0335(8) -0.0034(6) 0.0137(7) -0.0109(6) 
C22 0.0254(7) 0.0168(6) 0.0219(6) -0.0032(5) 0.0096(5) -0.0015(5) 
C23 0.0280(7) 0.0347(8) 0.0190(7) -0.0004(6) -0.0030(6) 0.0030(6) 
C24 0.0500(11) 0.0568(11) 0.0229(8) -0.0012(8) 0.0042(7) -0.0063(9) 
C25 0.0597(14) 0.0767(15) 0.0516(12) 0.0236(11) 0.0180(11) 0.0386(12) 
C26 0.0314(7) 0.0174(6) 0.0206(7) 0.0016(5) 0.0051(6) 0.0034(5) 
C27 0.0340(9) 0.0469(10) 0.0372(9) 0.0121(8) 0.0053(7) 0.0135(8) 
C28 0.0589(12) 0.0379(9) 0.0271(8) 0.0085(7) 0.0126(8) -0.0010(8) 
 
_geom_special_details 
; 
 All esds (except the esd in the dihedral angle between two l.s. planes) 
 are estimated using the full covariance matrix.  The cell esds are taken 
 into account individually in the estimation of esds in distances, angles 
 and torsion angles; correlations between esds in cell parameters are only 
 used when they are defined by crystal symmetry.  An approximate (isotropic) 
 treatment of cell esds is used for estimating esds involving l.s. planes. 
; 
 
loop_ 
 _geom_bond_atom_site_label_1 
 _geom_bond_atom_site_label_2 
 _geom_bond_distance 
 _geom_bond_site_symmetry_2 
 _geom_bond_publ_flag 
Al1 C1 2.0860(13) . ? 
Al1 Al1 2.6375(8) 3_575 ? 
Al1 H1 1.559(19) . ? 
Al1 H2 1.528(19) . ? 
N1 C1 1.3601(16) . ? 
N1 C2 1.3875(16) . ? 
N1 C4 1.4440(15) . ? 
C1 N2 1.3664(15) . ? 
N2 C3 1.3836(16) . ? 
N2 C17 1.4449(16) . ? 
C2 C3 1.3398(18) . ? 
C2 H2C 0.9500 . ? 
C3 H3C 0.9500 . ? 
C4 C10 1.3977(18) . ? 
C4 C5 1.4054(18) . ? 
C5 C6 1.3916(18) . ? 
C5 C11 1.5193(19) . ? 
C6 C7 1.386(2) . ? 
C6 H6 0.9500 . ? 
C7 C9 1.380(2) . ? 
C7 H7 0.9500 . ? 
C9 C10 1.3997(18) . ? 
C9 H9 0.9500 . ? 
C10 C14 1.5185(19) . ? 
C11 C13 1.527(2) . ? 
C11 C12 1.532(2) . ? 
C11 H11 1.0000 . ? 
C12 H12A 0.9800 . ? 
C12 H12B 0.9800 . ? 
C12 H12C 0.9800 . ? 
C13 H13A 0.9800 . ? 
C13 H13B 0.9800 . ? 
C13 H13C 0.9800 . ? 
C14 C16 1.526(2) . ? 
C14 C15 1.534(2) . ? 
C14 H14 1.0000 . ? 
C15 H15A 0.9800 . ? 
C15 H15B 0.9800 . ? 
C15 H15C 0.9800 . ? 
C16 H16A 0.9800 . ? 
C16 H16B 0.9800 . ? 
C16 H16C 0.9800 . ? 
C17 C22 1.3965(18) . ? 
C17 C18 1.3973(19) . ? 
C18 C19 1.394(2) . ? 
C18 C23 1.519(2) . ? 
C19 C20 1.378(2) . ? 
C19 H19 0.9500 . ? 
C20 C21 1.386(2) . ? 
C20 H20 0.9500 . ? 
C21 C22 1.3940(19) . ? 
C21 H21 0.9500 . ? 
C22 C26 1.515(2) . ? 
C23 C24 1.524(2) . ? 
C23 C25 1.527(2) . ? 
C23 H23 1.0000 . ? 
C24 H24A 0.9800 . ? 
C24 H24B 0.9800 . ? 
C24 H24C 0.9800 . ? 
C25 H25A 0.9800 . ? 
C25 H25B 0.9800 . ? 
C25 H25C 0.9800 . ? 
C26 C28 1.523(2) . ? 
C26 C27 1.527(2) . ? 
C26 H26 1.0000 . ? 
C27 H27A 0.9800 . ? 
C27 H27B 0.9800 . ? 
C27 H27C 0.9800 . ? 
C28 H28A 0.9800 . ? 
C28 H28B 0.9800 . ? 
C28 H28C 0.9800 . ? 
 
loop_ 
 _geom_angle_atom_site_label_1 
 _geom_angle_atom_site_label_2 
 _geom_angle_atom_site_label_3 
 _geom_angle 
 _geom_angle_site_symmetry_1 
 _geom_angle_site_symmetry_3 
 _geom_angle_publ_flag 
C1 Al1 Al1 110.23(4) . 3_575 ? 
C1 Al1 H1 103.0(7) . . ? 
Al1 Al1 H1 115.9(7) 3_575 . ? 
C1 Al1 H2 97.6(7) . . ? 
Al1 Al1 H2 117.6(7) 3_575 . ? 
H1 Al1 H2 110.0(10) . . ? 
C1 N1 C2 111.70(10) . . ? 
C1 N1 C4 125.15(10) . . ? 
C2 N1 C4 123.13(10) . . ? 
N1 C1 N2 103.24(10) . . ? 
N1 C1 Al1 129.48(9) . . ? 
N2 C1 Al1 127.13(9) . . ? 
C1 N2 C3 111.59(10) . . ? 
C1 N2 C17 127.00(10) . . ? 
C3 N2 C17 120.92(10) . . ? 
C3 C2 N1 106.64(11) . . ? 
C3 C2 H2C 126.7 . . ? 
N1 C2 H2C 126.7 . . ? 
C2 C3 N2 106.82(11) . . ? 
C2 C3 H3C 126.6 . . ? 
N2 C3 H3C 126.6 . . ? 
C10 C4 C5 123.61(11) . . ? 
C10 C4 N1 118.28(11) . . ? 
C5 C4 N1 118.07(11) . . ? 
C6 C5 C4 116.79(12) . . ? 
C6 C5 C11 121.71(12) . . ? 
C4 C5 C11 121.46(11) . . ? 
C7 C6 C5 121.06(13) . . ? 
C7 C6 H6 119.5 . . ? 
C5 C6 H6 119.5 . . ? 
C9 C7 C6 120.71(12) . . ? 
C9 C7 H7 119.6 . . ? 
C6 C7 H7 119.6 . . ? 
C7 C9 C10 120.93(13) . . ? 
C7 C9 H9 119.5 . . ? 
C10 C9 H9 119.5 . . ? 
C4 C10 C9 116.85(12) . . ? 
C4 C10 C14 122.39(11) . . ? 
C9 C10 C14 120.66(12) . . ? 
C5 C11 C13 113.63(11) . . ? 
C5 C11 C12 109.97(13) . . ? 
C13 C11 C12 110.49(12) . . ? 
C5 C11 H11 107.5 . . ? 
C13 C11 H11 107.5 . . ? 
C12 C11 H11 107.5 . . ? 
C11 C12 H12A 109.5 . . ? 
C11 C12 H12B 109.5 . . ? 
H12A C12 H12B 109.5 . . ? 
C11 C12 H12C 109.5 . . ? 
H12A C12 H12C 109.5 . . ? 
H12B C12 H12C 109.5 . . ? 
C11 C13 H13A 109.5 . . ? 
C11 C13 H13B 109.5 . . ? 
H13A C13 H13B 109.5 . . ? 
C11 C13 H13C 109.5 . . ? 
H13A C13 H13C 109.5 . . ? 
H13B C13 H13C 109.5 . . ? 
C10 C14 C16 113.17(13) . . ? 
C10 C14 C15 109.91(12) . . ? 
C16 C14 C15 109.95(13) . . ? 
C10 C14 H14 107.9 . . ? 
C16 C14 H14 107.9 . . ? 
C15 C14 H14 107.9 . . ? 
C14 C15 H15A 109.5 . . ? 
C14 C15 H15B 109.5 . . ? 
H15A C15 H15B 109.5 . . ? 
C14 C15 H15C 109.5 . . ? 
H15A C15 H15C 109.5 . . ? 
H15B C15 H15C 109.5 . . ? 
C14 C16 H16A 109.5 . . ? 
C14 C16 H16B 109.5 . . ? 
H16A C16 H16B 109.5 . . ? 
C14 C16 H16C 109.5 . . ? 
H16A C16 H16C 109.5 . . ? 
H16B C16 H16C 109.5 . . ? 
C22 C17 C18 123.52(12) . . ? 
C22 C17 N2 119.02(11) . . ? 
C18 C17 N2 117.39(11) . . ? 
C19 C18 C17 117.23(13) . . ? 
C19 C18 C23 120.26(13) . . ? 
C17 C18 C23 122.46(12) . . ? 
C20 C19 C18 120.83(14) . . ? 
C20 C19 H19 119.6 . . ? 
C18 C19 H19 119.6 . . ? 
C19 C20 C21 120.47(14) . . ? 
C19 C20 H20 119.8 . . ? 
C21 C20 H20 119.8 . . ? 
C20 C21 C22 121.23(14) . . ? 
C20 C21 H21 119.4 . . ? 
C22 C21 H21 119.4 . . ? 
C21 C22 C17 116.69(13) . . ? 
C21 C22 C26 122.53(13) . . ? 
C17 C22 C26 120.78(12) . . ? 
C18 C23 C24 111.41(13) . . ? 
C18 C23 C25 110.39(14) . . ? 
C24 C23 C25 111.25(15) . . ? 
C18 C23 H23 107.9 . . ? 
C24 C23 H23 107.9 . . ? 
C25 C23 H23 107.9 . . ? 
C23 C24 H24A 109.5 . . ? 
C23 C24 H24B 109.5 . . ? 
H24A C24 H24B 109.5 . . ? 
C23 C24 H24C 109.5 . . ? 
H24A C24 H24C 109.5 . . ? 
H24B C24 H24C 109.5 . . ? 
C23 C25 H25A 109.5 . . ? 
C23 C25 H25B 109.5 . . ? 
H25A C25 H25B 109.5 . . ? 
C23 C25 H25C 109.5 . . ? 
H25A C25 H25C 109.5 . . ? 
H25B C25 H25C 109.5 . . ? 
C22 C26 C28 113.26(13) . . ? 
C22 C26 C27 110.46(12) . . ? 
C28 C26 C27 109.99(13) . . ? 
C22 C26 H26 107.6 . . ? 
C28 C26 H26 107.6 . . ? 
C27 C26 H26 107.6 . . ? 
C26 C27 H27A 109.5 . . ? 
C26 C27 H27B 109.5 . . ? 
H27A C27 H27B 109.5 . . ? 
C26 C27 H27C 109.5 . . ? 
H27A C27 H27C 109.5 . . ? 
H27B C27 H27C 109.5 . . ? 
C26 C28 H28A 109.5 . . ? 
C26 C28 H28B 109.5 . . ? 
H28A C28 H28B 109.5 . . ? 
C26 C28 H28C 109.5 . . ? 
H28A C28 H28C 109.5 . . ? 
H28B C28 H28C 109.5 . . ? 
 
_diffrn_measured_fraction_theta_max    0.996 
_diffrn_reflns_theta_full              30.00 
_diffrn_measured_fraction_theta_full   0.996 
_refine_diff_density_max    0.360 
_refine_diff_density_min   -0.250 
_refine_diff_density_rms    0.049 
