# Supplementary material for: Synthesis of a stable adduct of dialane(4) (Al2H4) via hydrogenation of a magnesium(I) dimer
Source: Springer Nature journal article supplement (doi:10.1038/nchem.762), 2010-08-01
Supplement: 41557_2010_BFnchem762_MOESM9_ESM.mol [file 41557_2010_BFnchem762_MOESM9_ESM.mol]

  ChemDraw07151005592D

 64 69  0  0  0  0  0  0  0  0999 V2000
   -3.4497    1.0159    0.0000 C   0  0  0  0  0  0  0  0  0  0  0  0
   -3.4497    0.1909    0.0000 C   0  0  0  0  0  0  0  0  0  0  0  0
   -2.6651   -0.0640    0.0000 N   0  0  0  0  0  0  0  0  0  0  0  0
   -2.1801    0.6034    0.0000 C   0  0  0  0  0  0  0  0  0  0  0  0
   -2.6651    1.2709    0.0000 N   0  0  0  0  0  0  0  0  0  0  0  0
   -2.6651    2.0959    0.0000 C   0  0  0  0  0  0  0  0  0  0  0  0
   -2.6651   -0.8890    0.0000 C   0  0  0  0  0  0  0  0  0  0  0  0
   -1.9506    2.5084    0.0000 C   0  0  0  0  0  0  0  0  0  0  0  0
   -1.9506    3.3334    0.0000 C   0  0  0  0  0  0  0  0  0  0  0  0
   -2.6651    3.7459    0.0000 C   0  0  0  0  0  0  0  0  0  0  0  0
   -3.3795    3.3334    0.0000 C   0  0  0  0  0  0  0  0  0  0  0  0
   -3.3795    2.5084    0.0000 C   0  0  0  0  0  0  0  0  0  0  0  0
   -3.3795   -1.3015    0.0000 C   0  0  0  0  0  0  0  0  0  0  0  0
   -3.3795   -2.1265    0.0000 C   0  0  0  0  0  0  0  0  0  0  0  0
   -2.6651   -2.5390    0.0000 C   0  0  0  0  0  0  0  0  0  0  0  0
   -1.9506   -2.1265    0.0000 C   0  0  0  0  0  0  0  0  0  0  0  0
   -1.9506   -1.3015    0.0000 C   0  0  0  0  0  0  0  0  0  0  0  0
   -1.2361   -0.8890    0.0000 C   0  0  0  0  0  0  0  0  0  0  0  0
   -0.4392   -1.1025    0.0000 C   0  0  0  0  0  0  0  0  0  0  0  0
   -0.6528   -1.4724    0.0000 C   0  0  0  0  0  0  0  0  0  0  0  0
   -4.0940   -0.8890    0.0000 C   0  0  0  0  0  0  0  0  0  0  0  0
   -4.8909   -1.1025    0.0000 C   0  0  0  0  0  0  0  0  0  0  0  0
   -4.6774   -1.4724    0.0000 C   0  0  0  0  0  0  0  0  0  0  0  0
   -0.6821    0.6497    0.0000 Al  0  0  0  0  0  0  0  0  0  0  0  0
   -1.2361    2.0959    0.0000 C   0  0  0  0  0  0  0  0  0  0  0  0
   -0.4392    2.3094    0.0000 C   0  0  0  0  0  0  0  0  0  0  0  0
   -0.6528    2.6793    0.0000 C   0  0  0  0  0  0  0  0  0  0  0  0
   -4.0940    2.0959    0.0000 C   0  0  0  0  0  0  0  0  0  0  0  0
   -4.8909    2.3094    0.0000 C   0  0  0  0  0  0  0  0  0  0  0  0
   -4.6774    2.6793    0.0000 C   0  0  0  0  0  0  0  0  0  0  0  0
    3.4497   -0.1909    0.0000 C   0  0  0  0  0  0  0  0  0  0  0  0
    3.4497   -1.0159    0.0000 C   0  0  0  0  0  0  0  0  0  0  0  0
    2.6651   -1.2709    0.0000 N   0  0  0  0  0  0  0  0  0  0  0  0
    2.1801   -0.6034    0.0000 C   0  0  0  0  0  0  0  0  0  0  0  0
    2.6651    0.0640    0.0000 N   0  0  0  0  0  0  0  0  0  0  0  0
    2.6651    0.8890    0.0000 C   0  0  0  0  0  0  0  0  0  0  0  0
    2.6651   -2.0959    0.0000 C   0  0  0  0  0  0  0  0  0  0  0  0
    1.9506    1.3015    0.0000 C   0  0  0  0  0  0  0  0  0  0  0  0
    1.9506    2.1265    0.0000 C   0  0  0  0  0  0  0  0  0  0  0  0
    2.6651    2.5390    0.0000 C   0  0  0  0  0  0  0  0  0  0  0  0
    3.3795    2.1265    0.0000 C   0  0  0  0  0  0  0  0  0  0  0  0
    3.3795    1.3015    0.0000 C   0  0  0  0  0  0  0  0  0  0  0  0
    3.3795   -2.5084    0.0000 C   0  0  0  0  0  0  0  0  0  0  0  0
    3.3795   -3.3334    0.0000 C   0  0  0  0  0  0  0  0  0  0  0  0
    2.6651   -3.7459    0.0000 C   0  0  0  0  0  0  0  0  0  0  0  0
    1.9506   -3.3334    0.0000 C   0  0  0  0  0  0  0  0  0  0  0  0
    1.9506   -2.5084    0.0000 C   0  0  0  0  0  0  0  0  0  0  0  0
    1.2361   -2.0959    0.0000 C   0  0  0  0  0  0  0  0  0  0  0  0
    0.4392   -2.3094    0.0000 C   0  0  0  0  0  0  0  0  0  0  0  0
    0.6528   -2.6793    0.0000 C   0  0  0  0  0  0  0  0  0  0  0  0
    4.0940   -2.0959    0.0000 C   0  0  0  0  0  0  0  0  0  0  0  0
    4.8909   -2.3094    0.0000 C   0  0  0  0  0  0  0  0  0  0  0  0
    4.6774   -2.6793    0.0000 C   0  0  0  0  0  0  0  0  0  0  0  0
    0.6821   -0.5572    0.0000 Al  0  0  0  0  0  0  0  0  0  0  0  0
    1.2361    0.8890    0.0000 C   0  0  0  0  0  0  0  0  0  0  0  0
    0.4392    1.1025    0.0000 C   0  0  0  0  0  0  0  0  0  0  0  0
    0.6528    1.4724    0.0000 C   0  0  0  0  0  0  0  0  0  0  0  0
    4.0940    0.8890    0.0000 C   0  0  0  0  0  0  0  0  0  0  0  0
    4.8909    1.1025    0.0000 C   0  0  0  0  0  0  0  0  0  0  0  0
    4.6774    1.4724    0.0000 C   0  0  0  0  0  0  0  0  0  0  0  0
   -0.6821    1.4747    0.0000 H   0  0  0  0  0  0  0  0  0  0  0  0
    0.6821   -1.3822    0.0000 H   0  0  0  0  0  0  0  0  0  0  0  0
   -0.0987    1.2330    0.0000 H   0  0  0  0  0  0  0  0  0  0  0  0
    0.0987   -1.1406    0.0000 H   0  0  0  0  0  0  0  0  0  0  0  0
  1  2  2  0      
  2  3  1  0      
  3  4  1  0      
  4  5  1  0      
  5  1  1  0      
  5  6  1  0      
  3  7  1  0      
  6  8  2  0      
  8  9  1  0      
  9 10  2  0      
 10 11  1  0      
 11 12  2  0      
 12  6  1  0      
  7 13  2  0      
 13 14  1  0      
 14 15  2  0      
 15 16  1  0      
 16 17  2  0      
 17  7  1  0      
 17 18  1  0      
 18 19  1  0      
 18 20  1  0      
 13 21  1  0      
 21 22  1  0      
 21 23  1  0      
  8 25  1  0      
 25 26  1  0      
 25 27  1  0      
 12 28  1  0      
 28 29  1  0      
 28 30  1  0      
 31 32  2  0      
 32 33  1  0      
 33 34  1  0      
 34 35  1  0      
 35 31  1  0      
 35 36  1  0      
 33 37  1  0      
 36 38  2  0      
 38 39  1  0      
 39 40  2  0      
 40 41  1  0      
 41 42  2  0      
 42 36  1  0      
 37 43  2  0      
 43 44  1  0      
 44 45  2  0      
 45 46  1  0      
 46 47  2  0      
 47 37  1  0      
 47 48  1  0      
 48 49  1  0      
 48 50  1  0      
 43 51  1  0      
 51 52  1  0      
 51 53  1  0      
 38 55  1  0      
 55 56  1  0      
 55 57  1  0      
 42 58  1  0      
 58 59  1  0      
 58 60  1  0      
 24 61  1  0      
 54 62  1  0      
 24 63  1  0      
 54 64  1  0      
 24 54  1  0      
 24  4  2  0      
 54 34  2  0      
M  END
